# Supplementary material for: Solar-assisted co-electrolysis of glycerol and water for concurrent production of formic acid and hydrogen
Source: Royal Society of Chemistry journal article supplement (doi:10.1039/d1ta02654b), 2021-01-01
Supplement: d1ta02654b1.pdf [file d1ta02654b1.pdf]

## ***Supplementary Information:***

### **Solar-assisted co-electrolysis of glycerol and water for concurrent production of formic acid and hydrogen**

Zunjian Ke,<sup>a,b</sup> Nicholas Williams,<sup>b</sup> Xingxu Yan,<sup>c</sup> Sabrina Younan,<sup>b</sup> Dong He,<sup>a</sup> Xianyin Song,<sup>c</sup> Xiaoqing Pan,<sup>c,d</sup> Xiangheng Xiao<sup>\*a</sup> and Jing Gu<sup>\*b</sup>

<sup>a</sup>*Department of Physics, Key Laboratory of Artificial Micro- and Nano-structures of Ministry of Education, Wuhan University, Wuhan 430072, Hubei, China. E-mail: xxh@whu.edu.cn*

<sup>b</sup>*Department of Chemistry and Biochemistry, San Diego State University, San Diego, California 92182-1030, United States. E-mail: jgu@sdsu.edu*

<sup>c</sup>*Department of Materials Science and Engineering, University of California, Irvine, Irvine, California 92697, United States.*

<sup>d</sup>*Department of Physics and Astronomy, University of California, Irvine, Irvine, California 92697, United States.*

<sup>e</sup>*College of Materials Science and Engineering, Hunan University, Changsha 410082, Hunan, China.*

**Supplementary Figures and Tables: Figure S1-Figure S23**

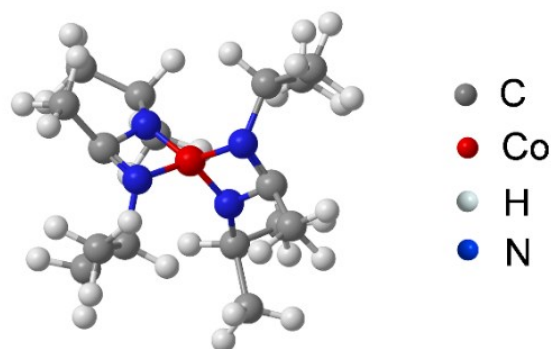

**Supplementary Fig. S1.** Molecular structure of Bis (N, N'-di-i-propylacetamidinato) cobalt (II) ( $C_{16}H_{34}CoN_4$ ).

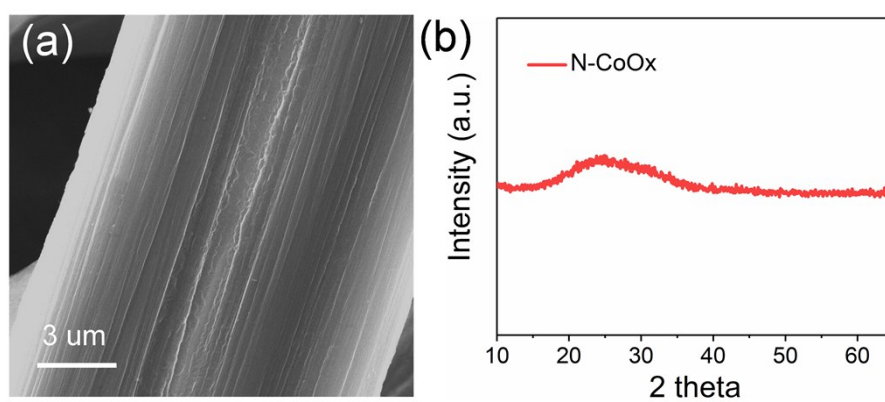

**Supplementary Fig. S2.** (a) SEM image and (b) XRD pattern of N-CoO<sub>x</sub>.

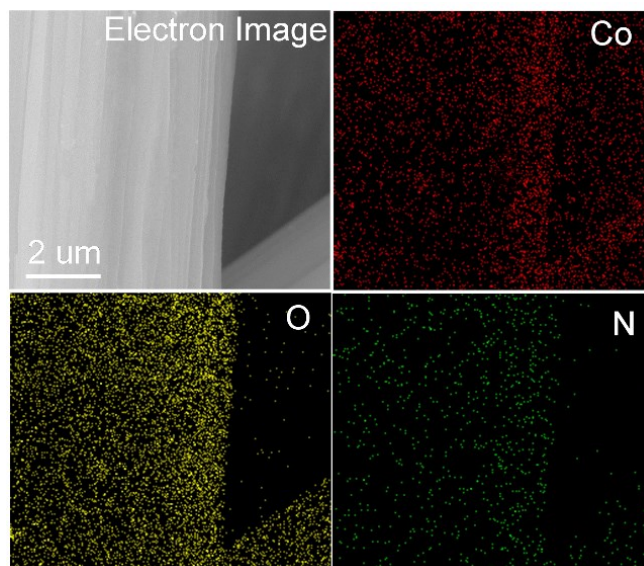

**Supplementary Fig. S3.** SEM-EDX elemental mappings of N-CoO<sub>x</sub> on carbon fiber paper.

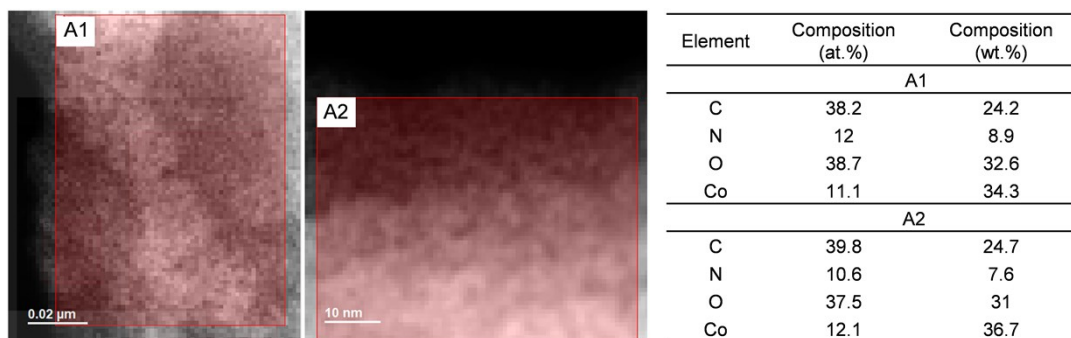

**Supplementary Fig. S4.** Elemental quantification analysis of N-CoO<sub>x</sub> by STEM-EDS.

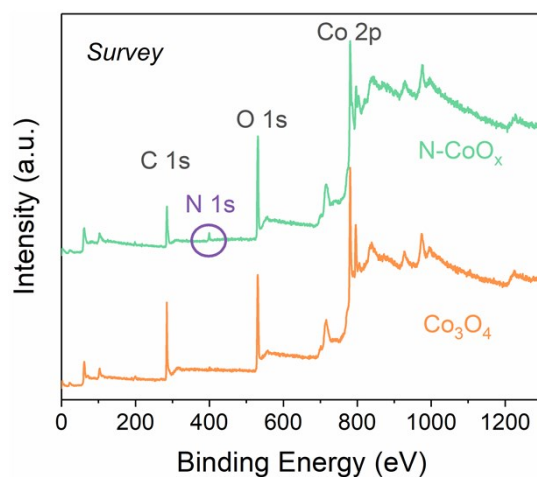

**Supplementary Fig. S5.** XPS survey of N-CoO<sub>x</sub> and Co<sub>3</sub>O<sub>4</sub>.

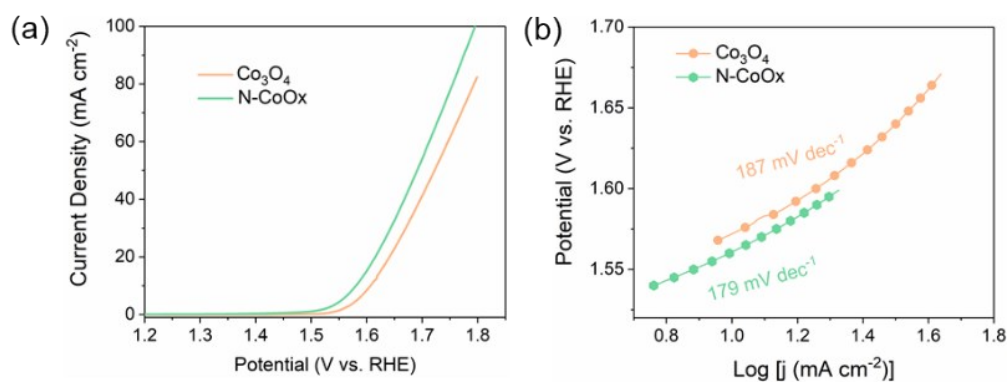

**Supplementary Fig. S6.** OER performances of Co<sub>3</sub>O<sub>4</sub> and N-CoO<sub>x</sub> in 1.0 M KOH solution. (a) LSV plots with 5 mV/s scan rate and without I-R compensation. (b) Tafel slopes calculated from (a).

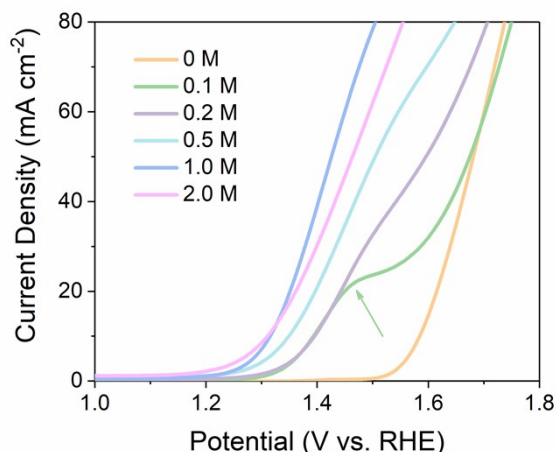

**Supplementary Fig. S7.** Glycerol oxidation in 1.0 M KOH solution with various concentrations of glycerol. (The turning point from glycerol oxidation to OER was pointed by green arrow. The performance tends to saturated as glycerol concentration increases.)

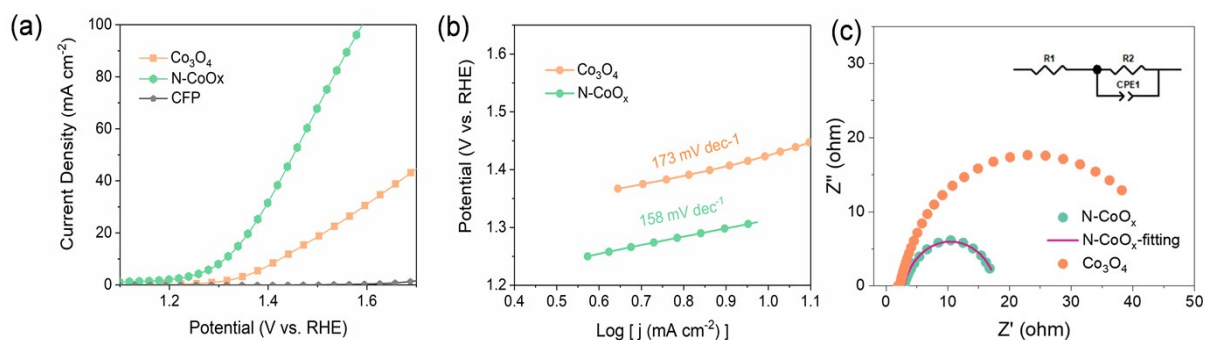

**Supplementary Fig. S8.** Glycerol oxidation performance of N-CoO<sub>x</sub> and Co<sub>3</sub>O<sub>4</sub>. (a) LSV plots (5 mV/s), (b) Tafel slopes, and (c) EIS collected in 1.0 M KOH solution with 1.0 M glycerol (1.20 V vs. RHE) and the corresponding fitted curves and equivalent circuits. The related fitting parameters are shown in Table S3. The fitted result matched well with experimental data, indicating the rationality of the model and reliability of the conclusion.

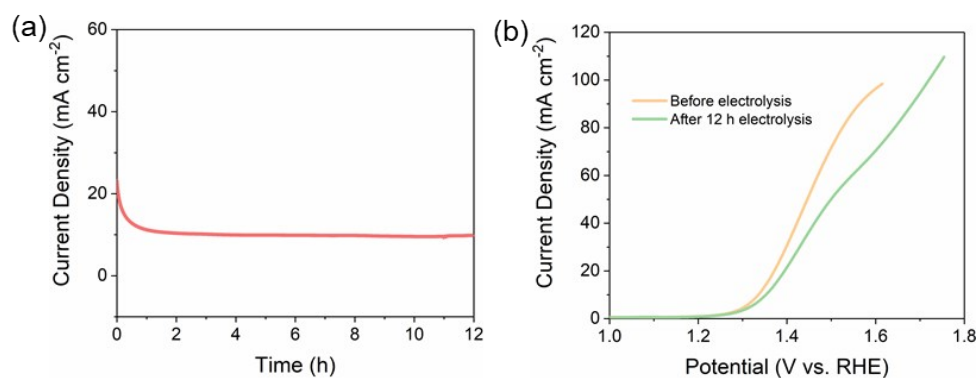

**Supplementary Fig. S9.** Long-term electrolysis measurements for glycerol electrooxidation. (a) I-t curve of 12 h electrolysis at 1.35V vs. RHE. (b) LSV plots before and after 12 h electrolysis.

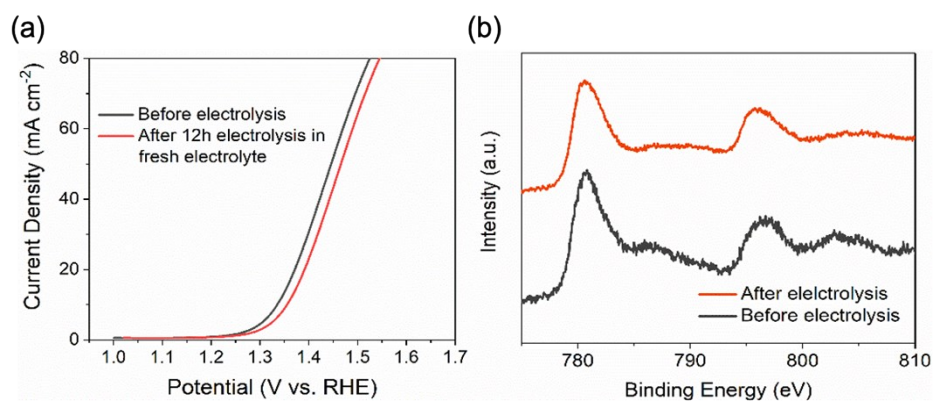

**Supplementary Fig. S10.** Comparison of N-CoO<sub>x</sub> catalytic activity before and after 12-hour electrolysis. (a) LSV of CoO<sub>x</sub> prior to and post electrolysis (b) XPS of Co 2p prior to and post electrolysis.

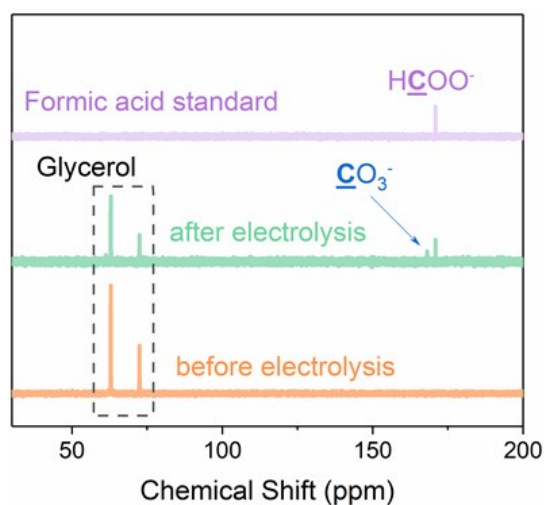

**Supplementary Fig. S11.**  $^{13}\text{C}$  NMR of 1.0 M KOH solution with 1.0 M glycerol before and after 60-hour electrolysis at 1.35 V (RHE). (HCOOH standard concentration: 60 mM in 1.0 M KOH solution)

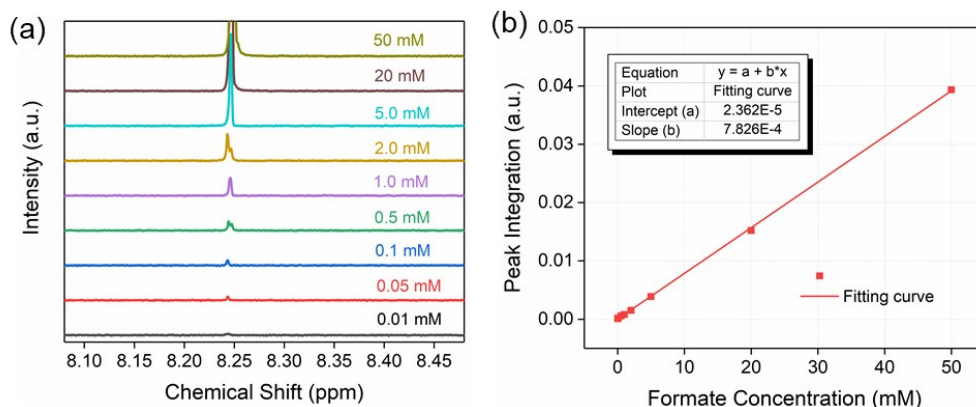

**Supplementary Fig. S12.** Formic acid concentration calibration. (a)  $^1\text{H}$  NMR of 1.0M KOH solutions with various concentrations of formic acid. (b) Fitted formic acid concentration plot.

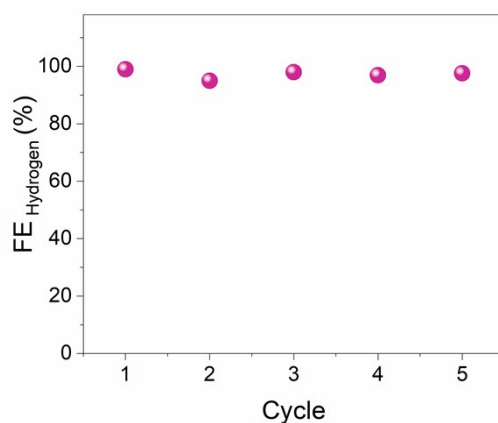

**Supplementary Fig. S13.** The FE of  $\text{H}_2$  during co-electrolysis of glycerol and water. The electrolysis was performed at 1.35 V vs. RHE in the same three-electrode system. Each electrolysis cycle lasted 3 hours. The  $\text{H}_2$  was detected by high-performance gas chromatography (GC).

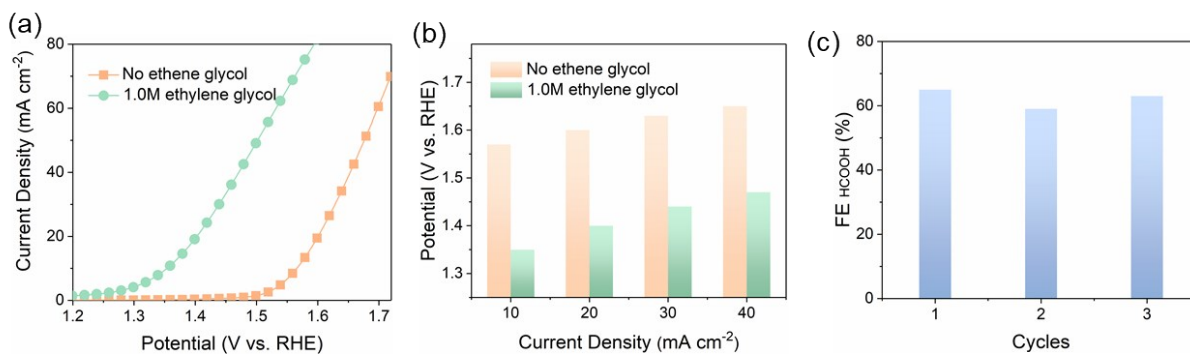

**Supplementary Fig. S14.** Ethylene glycol oxidation. (a) LSV plots (5 mV/s, without I-R compensation) and (b) potentials at different current density are collected in 1.0 M KOH solutions with and without 1.0 M ethylene glycol. (c) Faradaic efficiencies of formic acid for three successive electrolysis cycles at 1.40 V vs RHE.

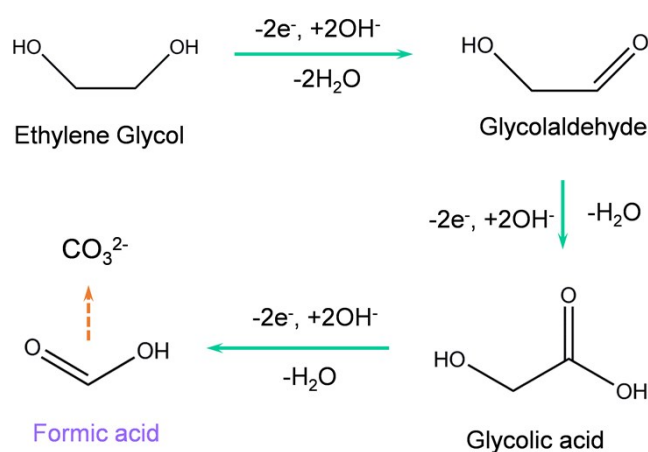

**Supplementary Fig. S15.** Proposed reaction pathway for ethylene glycol oxidation. The green solid and yellow dash arrow represent major and minor reaction routes, respectively. The formic acid was the major product (marked in purple). All steps were electrochemical oxidation processes with related electron transfer.

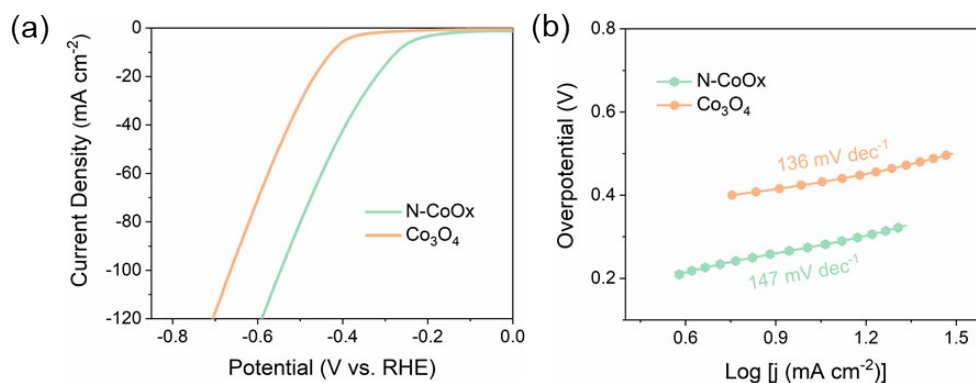

**Supplementary Fig. S16.** HER performance of Co<sub>3</sub>O<sub>4</sub> and N-CoO<sub>x</sub> in 1.0 M KOH solution.

(a) LSV plots (5 mV/s). (b) Tafel slopes calculated from (a).

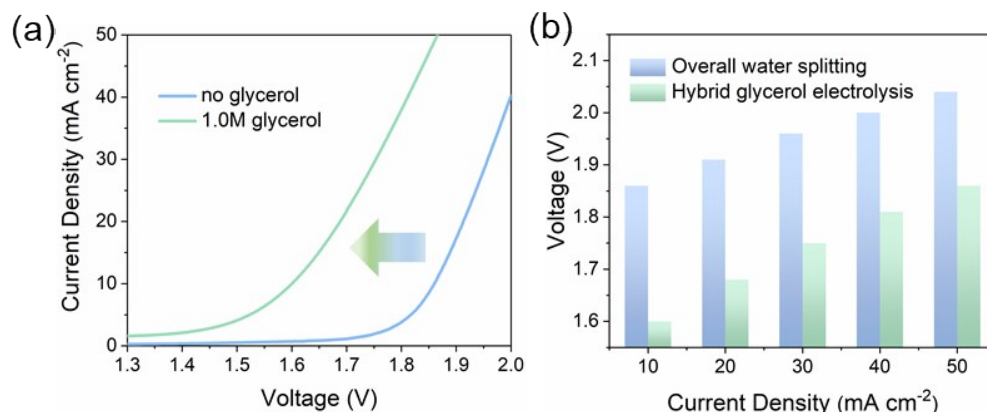

**Supplementary Fig. S17.** Hybrid glycerol electrolysis in coupled N-CoO<sub>x</sub>||N-CoO<sub>x</sub> system. (a)

LSV plots of N-CoO<sub>x</sub> in 1.0 M KOH solution with and without 1.0 M glycerol. (b) Cell voltages at various current densities.

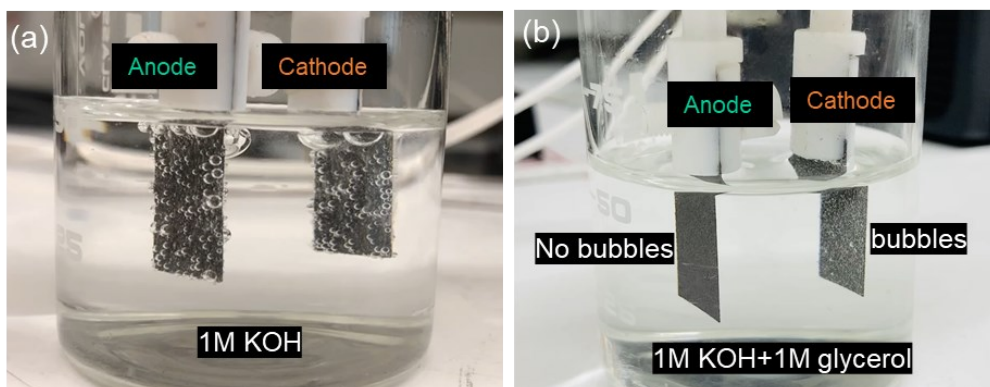

**Supplementary Fig. S18.** Digital pictures of N-CoO<sub>x</sub>||N-CoO<sub>x</sub> hybrid system in (a) 1.0 M

KOH solution and (b) 1.0 M KOH solution with 1.0 M glycerol.

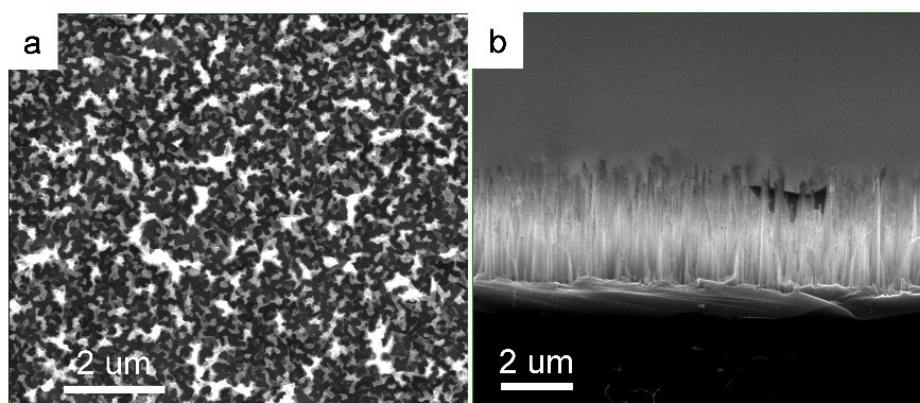



**Supplementary Fig. S19.** SEM images of Si NW-Pt. (a) Top view, (b) Cross-sectional view.

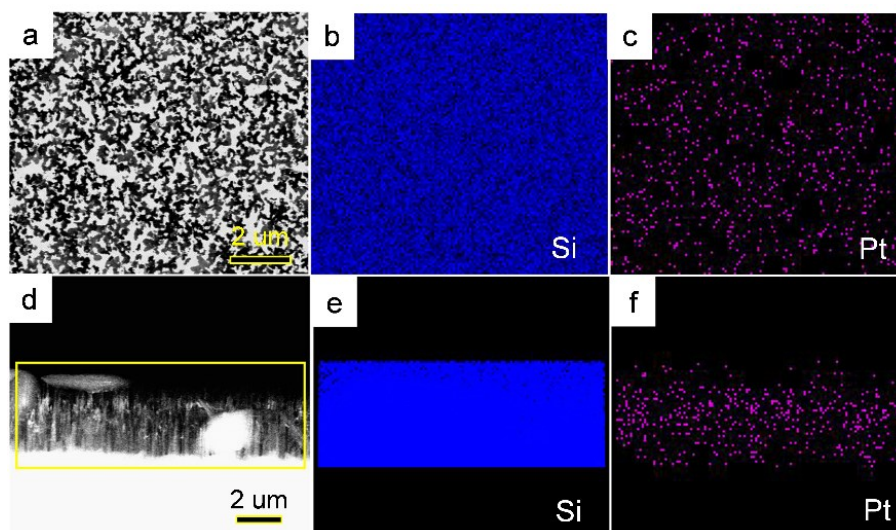

**Supplementary Fig. S20.** SEM-EDX elemental mapping for Si NW-Pt. (a-c) Top view, (d-f) Cross-sectional view.

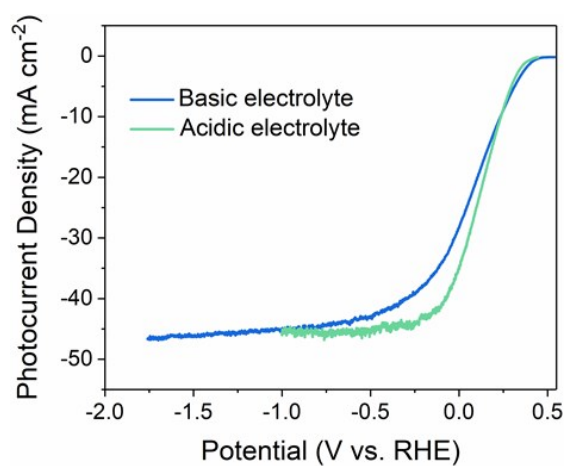

**Supplementary Fig. S21.** Photocurrent density of Si NW/Pt photoelectrode for hydrogen evolution in 1.0 M KOH and 0.5 M H<sub>2</sub>SO<sub>4</sub> solution under AM 1.5G simulated sunlight illumination.

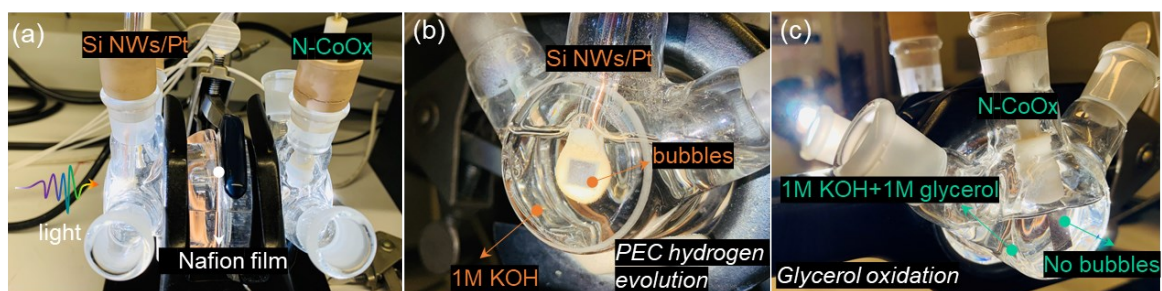

**Supplementary Fig. S22.** Digital pictures of N-CoO<sub>x</sub>||Si NW/Pt hybrid system. (a) Front view, (b) left side view, and (c) right side view of the system.

**Supplementary Table S1.** Economic value evaluations for typical electrolysis and co-electrolysis of glycerol and water.

| System                                | Overall reaction                                                                        | products                                           | Mass of anode products vs. per kg H <sub>2</sub> (kg) | Unit price of anode products (US \$) | Total Values of anode products vs. per kg H <sub>2</sub> (US \$) |
|---------------------------------------|-----------------------------------------------------------------------------------------|----------------------------------------------------|-------------------------------------------------------|--------------------------------------|------------------------------------------------------------------|
| Typical water electrolysis            | $2\text{H}_2\text{O}=2\text{H}_2+\text{O}_2$                                            | O <sub>2</sub> (anode)<br>H <sub>2</sub> (cathode) | 8                                                     | ~ 0.10                               | ~ 0.80                                                           |
| Co-electrolysis of glycerol and water | $\text{C}_3\text{H}_8\text{O}_3+3\text{H}_2\text{O}=3\text{HCOOH}+\text{H}+4\text{H}_2$ | HCOOH (anode)<br>H <sub>2</sub> (cathode)          | 17.25                                                 | 1.0                                  | 17.25                                                            |

**Supplementary Table 2.** Recent works for hybrid hydrogen evolution and organic oxidation.

| catalyst                                                                                           | Electrolyte                           | Anodic major product       | Faradaic efficiency | Three-electrode system |                                 |                                 | Two-electrode system           |                                 | Ref              |
|----------------------------------------------------------------------------------------------------|---------------------------------------|----------------------------|---------------------|------------------------|---------------------------------|---------------------------------|--------------------------------|---------------------------------|------------------|
|                                                                                                    |                                       |                            |                     | $E_{\text{HER}}$ (V)   | $E_{\text{OER}}$ (V)            | $E_{\text{COR}}$ (V)            | $E_1$ (V)                      | $E_2$ (V)                       |                  |
| N-CoO <sub>x</sub> anode<br>Si NW-Pt photocathode                                                  | 1 M KOH+1 M glycerol                  | Formic acid                | 96.2 %              | +0.24 (photocathode)   | 1.58                            | 1.31                            | 1.34                           | <b>1.15</b>                     | <b>This work</b> |
| Ni-Mo-N/CFC anode<br>Ni-Mo-N/CFC cathode                                                           | 1 M KOH+0.1 M glycerol                | Formic acid                | 95%                 | -0.043                 | 1.57                            | 1.30                            | 1.62                           | 1.36                            | 1                |
| NiFeO <sub>x</sub> anode<br>NiFeN <sub>x</sub> cathode                                             | 1 M KOH+0.1 M glucose                 | Glucaric acid              | 87%                 | -0.0406                | 1.3 at 2.61 mA cm <sup>-2</sup> | 1.3 at 87.6 mA cm <sup>-2</sup> | -                              | 1.39 at 100 mA cm <sup>-2</sup> | 2                |
| CuCo <sub>2</sub> O <sub>4</sub> anode                                                             | 0.1 M KOH+0.1 M glycerol              | Formic acid                | 89.1%               | -                      | 1.55-1.6                        | 1.26                            | -                              | -                               | 3                |
| Ni <sub>2</sub> P/Ni/NF anode<br>Ni <sub>2</sub> P/Ni/NF cathode                                   | 1M KOH+30mM Furfural                  | Furoic acid                | Almost 100 %        | -                      | 1.55 (onset)                    | 1.43 (onset)                    | 1.59                           | 1.48                            | 4                |
| CoNi-PHNs anode<br>CoS <sub>2</sub> -MoS <sub>2</sub> cathode                                      | 1 M KOH+1 M ethanol                   | acetic acid                | 99%                 | -                      | >1.7                            | 1.39                            | ~ 1.8                          | ~1.6                            | 5                |
| Co-P-Cu foam anode<br>Co-P-Cu foam cathode                                                         | 1M KOH+50 mM 5-hydroxy methylfurfural | 2,5-furandicarboxylic acid | ~90%                | -                      | 1.53 (20 mA cm <sup>-2</sup> )  | 1.38 (20 mA cm <sup>-2</sup> )  | 1.59 (20 mA cm <sup>-2</sup> ) | 1.44 (20 mA cm <sup>-2</sup> )  | 6                |
| NF/NiMoO-Ar anode<br>NF/NiMoO-H <sub>2</sub> cathode                                               | 1 M KOH+0.5 M urea                    | N <sub>2</sub>             | -                   | 11                     | -                               | 1.37                            | 1.55                           | 1.38                            | 7                |
| NC@CuCo <sub>2</sub> N <sub>x</sub> /C F anode<br>NC@CuCo <sub>2</sub> N <sub>x</sub> /C F cathode | 1.0 M KOH+15 Mm benzyl alcohol        | benzaldehydes              | 98%                 | 105                    | 1.46                            | 1.25                            | 1.62                           | 1.55                            | 8                |

**Note:** All the potentials here are V vs. RHE. All the potentials corresponded to 10 mA cm<sup>-2</sup>

unless otherwise marked.  $E_{\text{COR}}$ : potentials for chemical oxidation.  $E_1$ : cell voltages for overall water-splitting.  $E_2$ : cell voltages for the organic oxidation integrated HER.

**Supplementary Table S3. The related EIS fitting parameters for N-CoO<sub>x</sub> sample.**

| R1    | R2    | CPE1-T   | CPE1-P  |
|-------|-------|----------|---------|
| 2.974 | 14.95 | 0.012041 | 0.85933 |

### Supplementary References

1. Y. Li, X. Wei, L. Chen, J. Shi and M. He, *Nat. Commun.*, 2019, **10**, 1-12.
2. W. J. Liu, Z. Xu, D. Zhao, X. Q. Pan, H. C. Li, X. Hu, Z. Y. Fan, W. K. Wang, G. H. Zhao, S. Jin, G. W. Huber and H. Q. Yu, *Nat. Commun.*, 2020, **11**, 265.
3. X. Han, H. Sheng, C. Yu, T. W. Walker, G. W. Huber, J. Qiu and S. Jin, *ACS Catal.*, 2020, **10**, 6741-6752.

4. N. Jiang, X. Liu, J. Dong, B. You, X. Liu and Y. Sun, *ChemNanoMat*, 2017, **3**, 491-495.
5. W. Wang, Y. B. Zhu, Q. Wen, Y. Wang, J. Xia, C. Li, M. W. Chen, Y. Liu, H. Li, H. A. Wu and T. Zhai, *Adv. Mater.*, 2019, **31**, e1900528.
6. N. Jiang, B. You, R. Boonstra, I. M. Terrero Rodriguez and Y. Sun, *ACS Energy Lett.*, 2016, **1**, 386-390.
7. Z.-Y. Yu, C.-C. Lang, M.-R. Gao, Y. Chen, Q.-Q. Fu, Y. Duan and S.-H. Yu, *Energ. & Environ. Sci.*, 2018, **11**, 1890-1897.
8. J. Zheng, X. Chen, X. Zhong, S. Li, T. Liu, G. Zhuang, X. Li, S. Deng, D. Mei and J.-G. Wang, *Adv. Funct. Mater.*, 2017, **27**, 1704169.
